# Supplementary material for: WHSC1 Promotes Oncogenesis through Regulation of NIMA-Related Kinase-7 in Squamous Cell Carcinoma of the Head and Neck
Source: Oxford University Press journal article supplement (doi:10.1158/1541-7786.mcr-14-0292-t), 2014-10-04
Supplement: 15417786mcr140292t-sup-131966_1_supp_2647484_nbgq9g.pdf [file 15417786mcr140292t-sup-131966_1_supp_2647484_nbgq9g.pdf]

## **Supplementary information**

The file contains

Supplementary Figures S1 – S5

Supplementary Tables S1 – S4

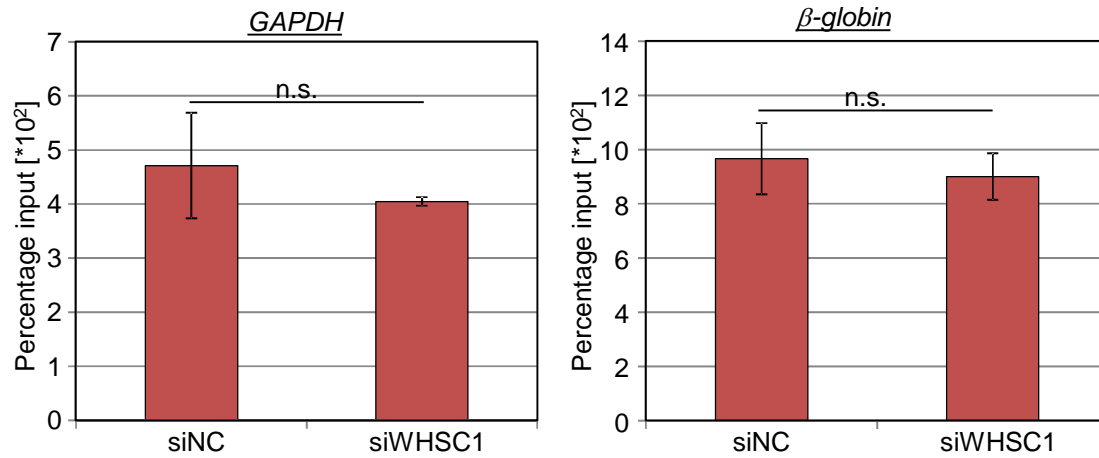

**Figure S1.** Chromatin immunoprecipitation assays (ChIP) performed in UD-SCC-2 cells treated with siWHSC1 for 3 days. Real-time PCR analysis was conducted using primer pairs as described under “Materials and Methods”. Immunoprecipitation was performed with ChIP grade anti-H3K36me2 (Millipore, 07-369) antibodies. Y-axis shows a percentage of the input chromatin. Results are the mean  $\pm$ SD of three independent experiments, and *P*-values were calculated using Student’s *t*-test (n.s.: not significant).

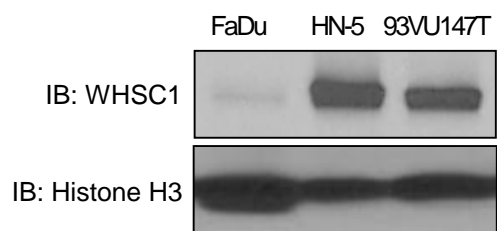

**Figure S2.** WHSC1 protein expression of three SCCHN (FaDu, HN-5 and 93VU147T) cells. Nuclear extracts were immunoblotted with anti-WHSC1 (Abcam, ab75359) and anti-histone H3 (Abcam, ab1791) antibodies. Histone H3 was served as an internal control.

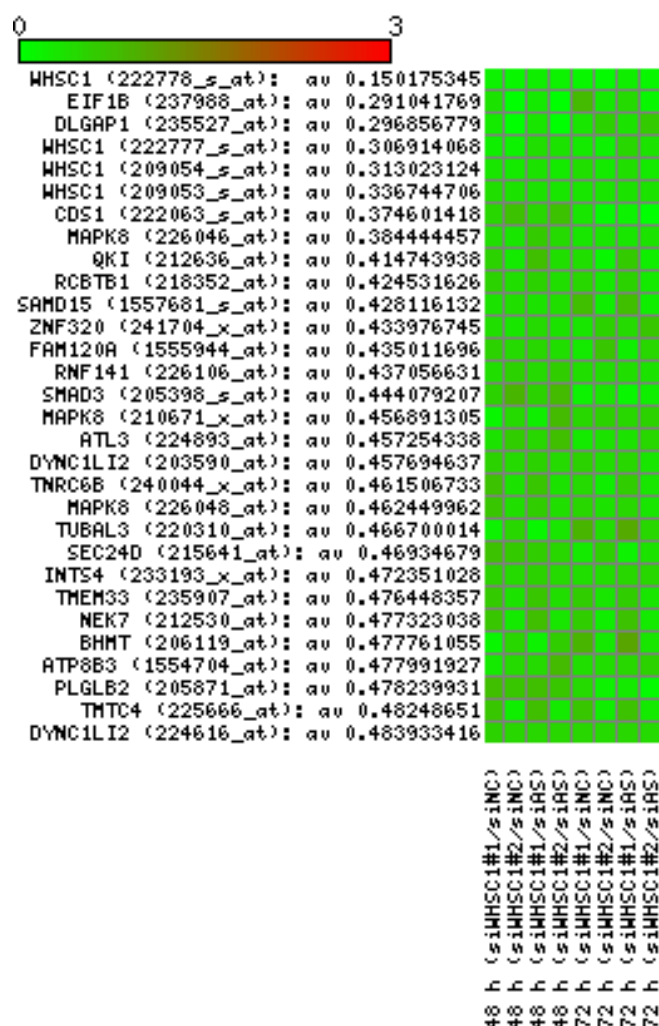

**Figure S3.** Heatmap of down regulated-genes at 48 h and 72 h of WHSC1 knockdown in UD-SCC-2 cells.

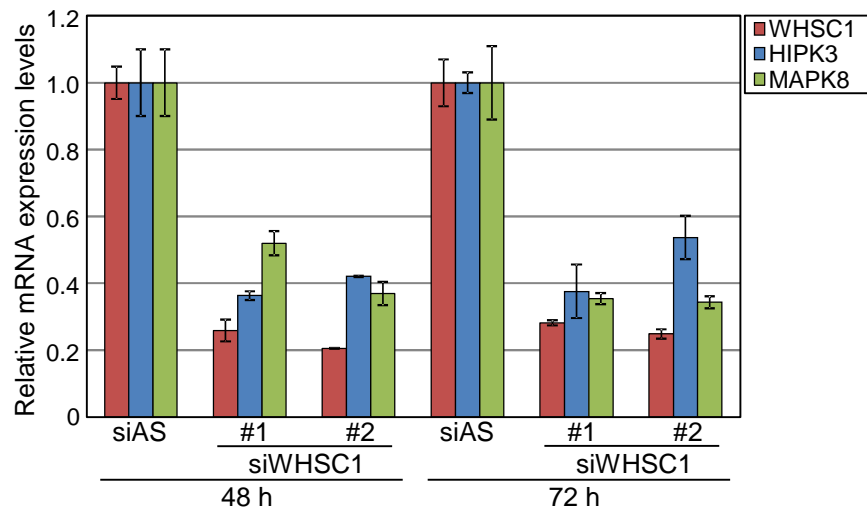

**Figure S4.** Validation of *WHSC1*, *HIK3* and *MAPK8* expressions in HPV-positive (UD-SCC-2) cells by quantitative real-time PCR 48 or 72 h after treatment with siRNAs.

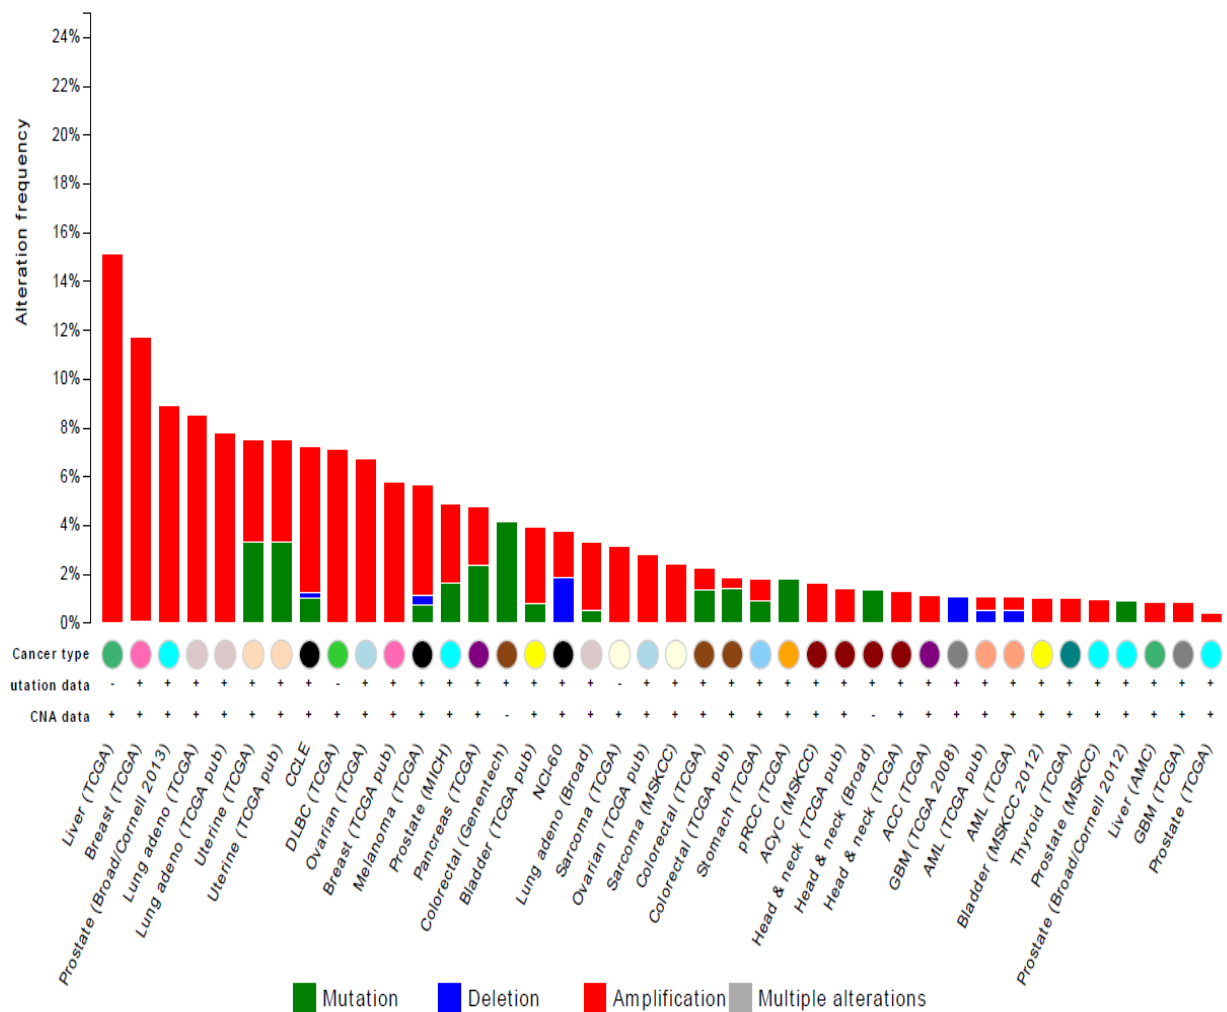

**Figure S5.** Cross-cancer alteration summary for NEK7. The data were obtained from the TCGA database (<http://www.cbioportal.org/public-portal/>).

**Table S1.** Characteristics of SCCHN cell lines.

| Cell name  | TNM stage | Specimen site   | Gender | HPV status     |
|------------|-----------|-----------------|--------|----------------|
| UD-SCC-2   | T1N2M0    | Hypopharynx     | Male   | HPV16-positive |
| UM-SCC-23  | T3N0M0    | Larynx          | Female | HPV16-negative |
| SCC-25     | T2N1M0    | Oral cavity     | Male   | HPV16-negative |
| SCC-35     | T4N0M0    | Hypopharynx     | Male   | HPV16-negative |
| UT-SCC-40  | T3N0M0    | Oral cavity     | Male   | HPV16-negative |
| HN-SCC-135 | T1N1M0    | Hard Palate     | -      | HPV16-negative |
| HN-SCC-151 | T3N0M0    | Oral tongue     | -      | HPV16-negative |
| HN-SCC-166 | T4N0M0    | Hard Palate     | -      | HPV41-positive |
| PE/CA-PJ15 | -         | Oral tongue     | Male   | HPV16-negative |
| OECM-1     | -         | Oral cavity     | Male   | HPV16-negative |
| BICR31     | T4N2M0    | Oral tongue     | Male   | HPV16-negative |
| 93VU147T   | T4N2M0    | Floor of mouth  | Male   | HPV16-positive |
| FaDu       | -         | Hypopharynx     | Male   | HPV16-negative |
| JSQ-3      | T3N0M0    | Nasal vestibule | Male   | HPV16-negative |
| HN-5       | T2N0M0    | Oral cavity     | Male   | HPV16-negative |
| HN-6       | T2N0M0    | Oral cavity     | Male   | HPV16-negative |

**Table S2.** Primer Sequences for Quantitative RT-PCR.

| Gene name                          | Primer sequence                     |
|------------------------------------|-------------------------------------|
| <i>GAPDH</i> (housekeeping gene)-f | 5' GCAAATTCCATGGCACCGTC 3'          |
| <i>GAPDH</i> (housekeeping gene)-r | 5' TCGCCCCACTTGATTTTGG 3'           |
| <i>SDH</i> (housekeeping gene)-f   | 5' TGGGAACAAGAGGGCATCTG 3'          |
| <i>SDH</i> (housekeeping gene)-r   | 5' CCACCACTGCATCAAATTCATG 3'        |
| <i>WHSC1</i> -f                    | 5' AATATGACTCCTTGCTGGAGCAGG 3'      |
| <i>WHSC1</i> -r                    | 5' ATTTCAACAGGTGGTCTTTGTCTC 3'      |
| <i>HIPK3</i> - f                   | 5' AAG AGC ATG AGG CAG AGA CAG 3'   |
| <i>HIPK3</i> -r                    | 5' TCC TTC CAA ATC CAT CAC TGT G 3' |
| <i>MAPK8</i> -f                    | 5' GAA GCT CCA CCA CCA AAG ATC 3'   |
| <i>MAPK8</i> -r                    | 5' TTG GTT CTC TCC TCC AAG TCC 3'   |
| <i>NEK7</i> -f                     | 5' CAC CTG TTC CTC AGT TCC AAC 3'   |
| <i>NEK7</i> -r                     | 5' CTC CAT CCA AGA GAC AGG CTG 3'   |



**Table S3.** siRNA Sequences.

| siRNA name                       | Sequence |                                      |
|----------------------------------|----------|--------------------------------------|
| siNegative control<br>(Cocktail) | Target#1 | Sense: 5' AUCCGCGCGAUAGUACGUA 3'     |
|                                  |          | Antisense: 5' UACGUACUAUCGCGCGGAU 3' |
|                                  | Target#2 | Sense: 5' UUACGCGUAGCGUAAUACG 3'     |
|                                  |          | Antisense: 5' CGUAUUACGCUACGCGUAA 3' |
|                                  | Target#3 | Sense: 5' UAUUCGCGCGUAUAGCGGU 3'     |
|                                  |          | Antisense: 5' ACCGCUAUACGCGCGAAUA 3' |
| siWHSC1#1                        |          | Sense: 5' CAGAUCUACACAGCGGAUA 3'     |
|                                  |          | Antisense: 5' UAUCCGCUGUGUAGAUCUG 3' |
| siWHSC1#2                        |          | Sense: 5' GUUAAUUGGCAUAUGGAAU 3'     |
|                                  |          | Antisense: 5' AUUCCAUAUGCCAAUUAAC 3' |

**Table S4.** Gene Ontology analysis of candidate genes.

| Gene Ontology                                                   | P-value | Genes                                |
|-----------------------------------------------------------------|---------|--------------------------------------|
| <b>Downregulated <math>\geq 50\%</math> baseline (26 genes)</b> |         |                                      |
| Translation                                                     | <0.05   | EIF1B, TNRC6B                        |
| Transcription Regulation                                        |         | RCBTB1, ZNF320, RNF141, SMAD3, HIPK3 |
| snRNA Processing                                                |         | INTS4                                |
| mRNA Processing                                                 |         | QKI                                  |
| Cytokinesis                                                     |         | NEK7                                 |
| MAPK/JNK Cascade                                                |         | MAPK8                                |
| Apoptosis                                                       |         | HIPK3, MAPK8                         |
| Fibroblast-growth-factor receptor                               |         | TNRC6B                               |
| Signaling                                                       |         | MAPK8                                |
| Neuronal Differentiation                                        |         | MAPK8                                |
| Postembryonic Development                                       |         | STX2                                 |
| Epithelial/Cellular Differentiation                             |         | CDS1                                 |
| Phosphatidylinositol                                            |         | ATL3, TUBAL3, BHMT, ATP8B3           |
| Biosynthetic Process                                            |         | DLGAP1                               |
| Metabolic Processes                                             |         | DYNC1LI2                             |
| Cell-cell Signaling                                             |         | SEC24D                               |
| Cytoplasmic Transport                                           |         |                                      |
| Antigen Processing                                              |         |                                      |
| <b>Upregulated <math>\geq 2</math>-fold baseline (5 genes)</b>  |         |                                      |
| Protein Phosphorylation                                         | <0.05   | DAPK1                                |
| TOR Signaling                                                   |         | PIK3AP1                              |
| Cell Differentiation                                            |         | PPDPF                                |
| Metabolic Processes                                             |         | UGT2A1/2                             |
| Axonogenesis                                                    |         | SLITRK6                              |
